# Supplementary material for: Composites based on poly(o-toluidine) and reduced graphene oxide: from synthesis to optical characterization and potential applications in the energy storage field
Source: Royal Society of Chemistry journal article supplement (doi:10.1039/d6ra00288a), 2026-04-27
Supplement: d6ra00288a1.pdf [file d6ra00288a1.pdf]

Supplementary information

## **Composites based on poly(o-toluidine) and reduced graphene oxide composites: from synthesis to optical characterization and potential applications in the energy storage field**

T. Burlanescu<sup>a,b</sup>, M. Vaduva<sup>b</sup>, A. Androne<sup>b</sup>, M. Paraschiv<sup>b</sup>, M. Cercel<sup>b</sup>, C. Negrila<sup>b</sup>, M. Baibarac<sup>b\*</sup>

<sup>a</sup>University of Bucharest, Faculty of Physics, Atomistilor Street 405, Magurele, Romania.

<sup>b</sup>National Institute of Materials Physics, Atomistilor street 405A, Magurele, Romania.

Corresponding author: Dr. M. Baibarac

E-mail: barac@infim.ro

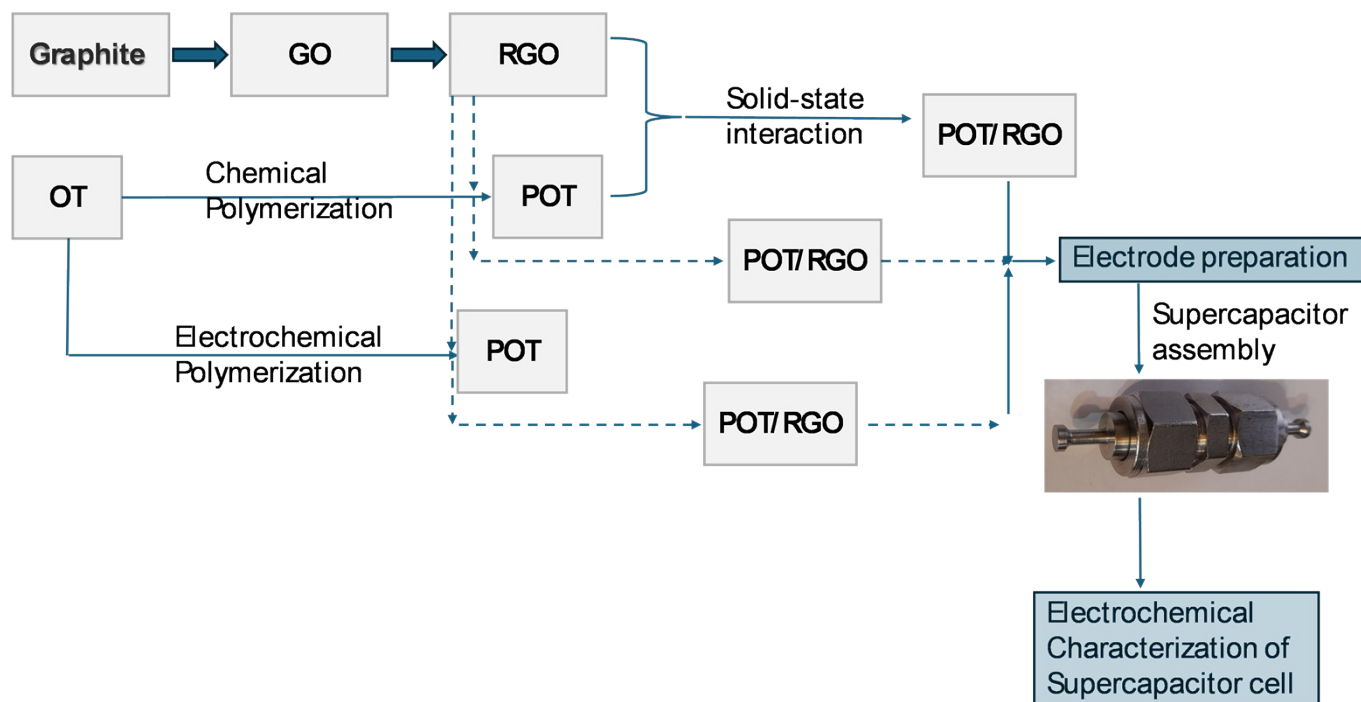

**Figure S1.** A schematic flowchart summarizing the synthesis routes of RGO and POT/RGO composites, electrode preparation, and cell assembly

### Scheme 1S. Electrochemical mechanism of POT/RGO composite synthesis

#### 1) OT oxidation reaction:

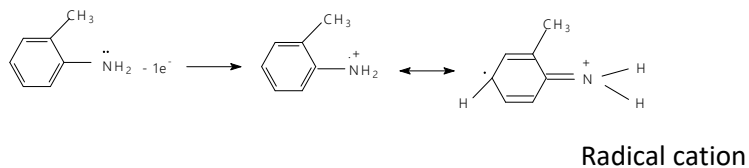

#### 2) OT cation radical reaction with RGO:

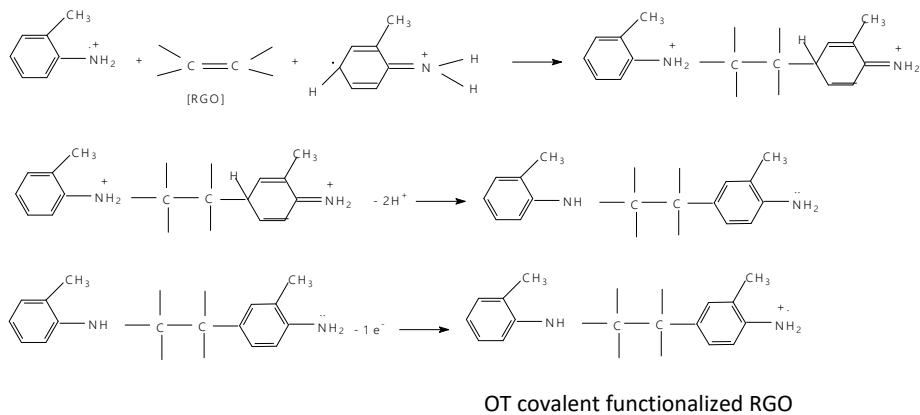

#### 3) The propagation reaction of the macromolecular chain of POT

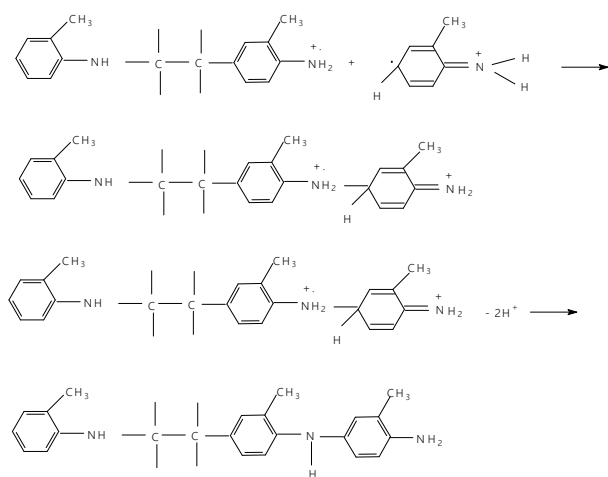

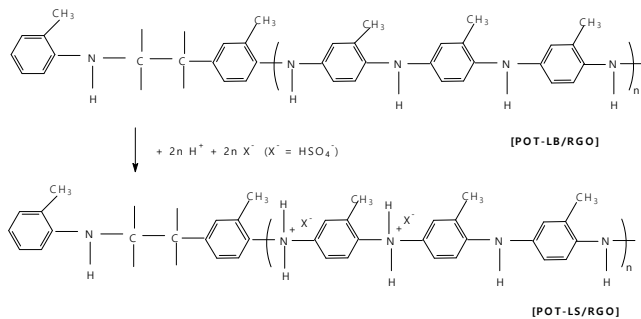

#### 4) Transformation of POT-LS/RGO into POT-ES/RGO and POT-PS/RGO

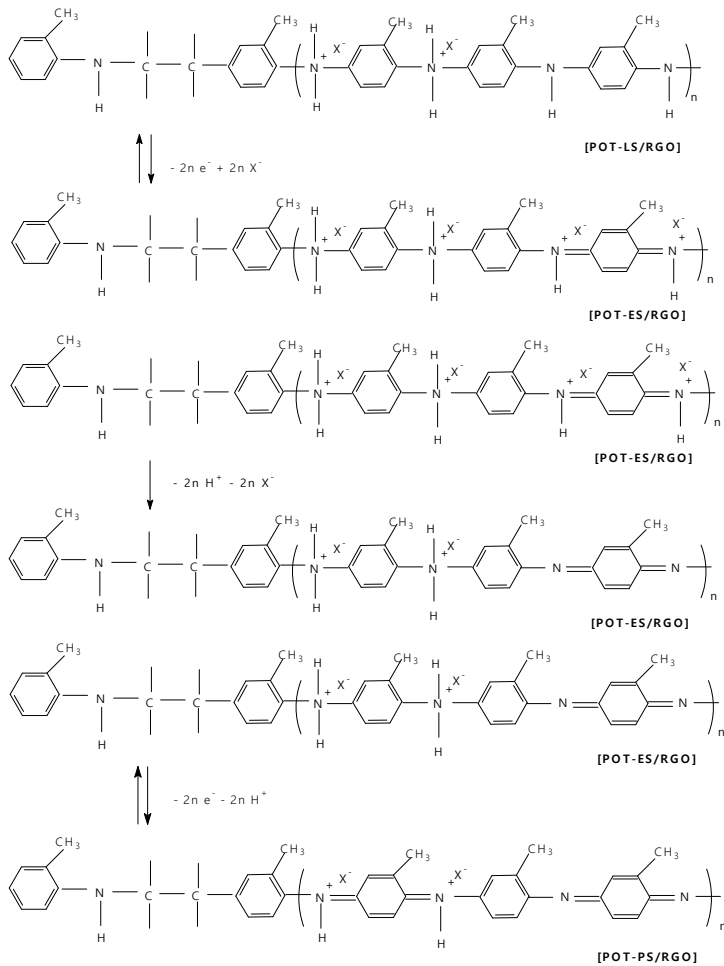

#### 5) Transformation of POT-PS/RGO into POT-EB/RGO and POT-ES/RGO

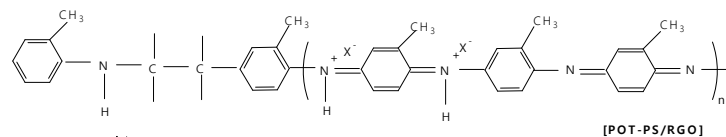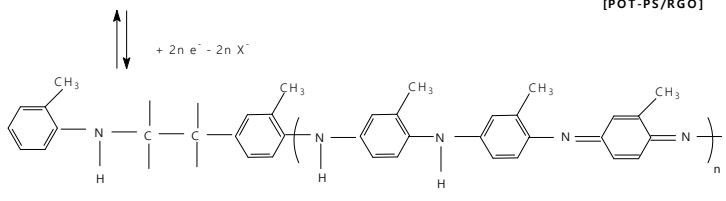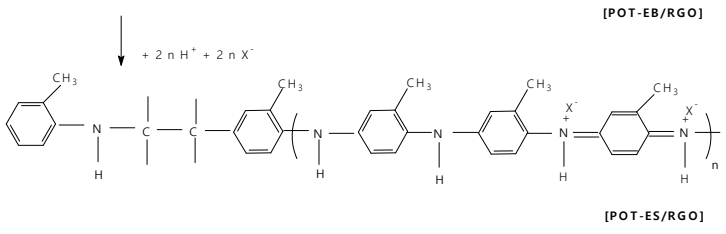

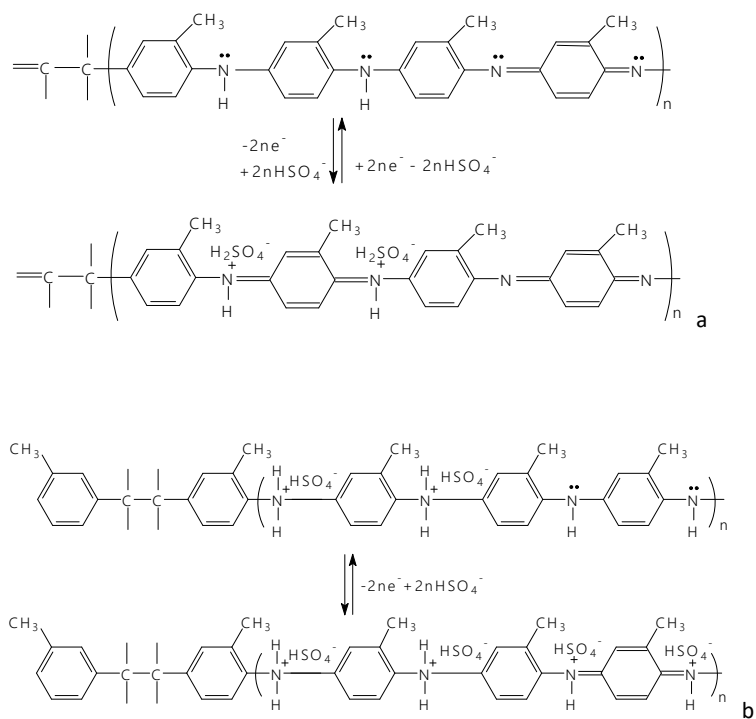

**Scheme 2S.** The reactions at the electrode/electrolyte interface in the case of the electrodes containing the POT-EB/RGO composites synthesized by chemical polymerization of OT in the presence of RGO (a) and the POT-ES/RGO composite synthesized by electrochemical polymerization of OT in the presence of RGO (b)
